# Supplementary material for: Bhlhe40 differentially regulates the function and number of peroxisomes and mitochondria in myogenic cells
Source: PubMed Central journal article supplement — Redox Biol. 2018 Oct 29;20:321–33. doi: 10.1016/j.redox.2018.10.009 (PMC6218633; doi:10.1016/j.redox.2018.10.009), 2018-10-29
Supplement: mmc1.pdf [file mmc1.pdf]

Supplementary figure 1

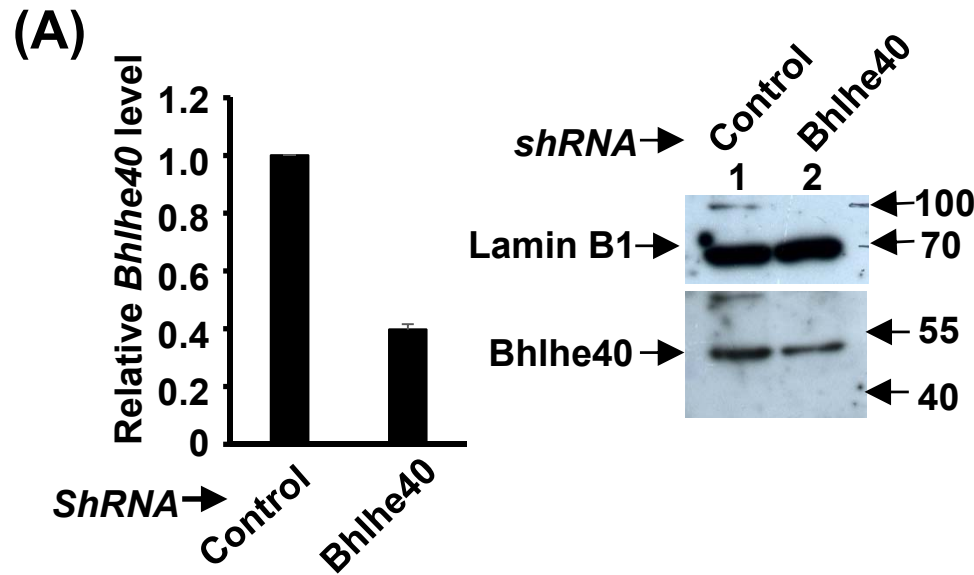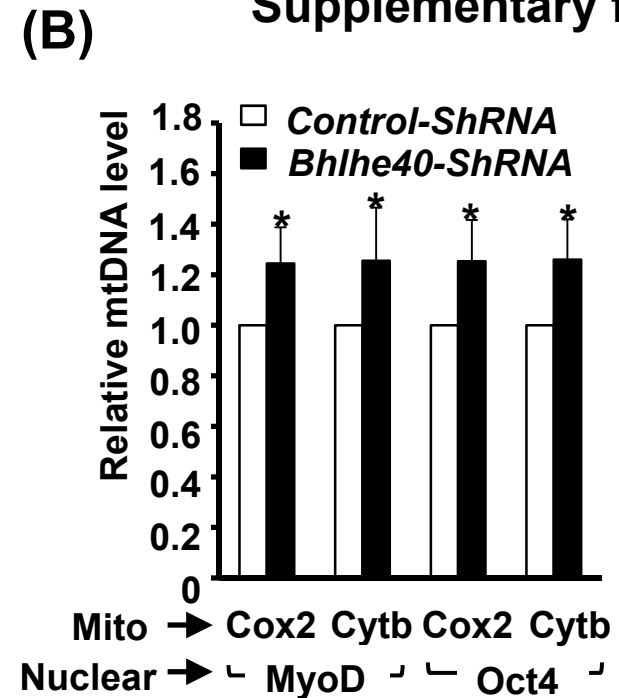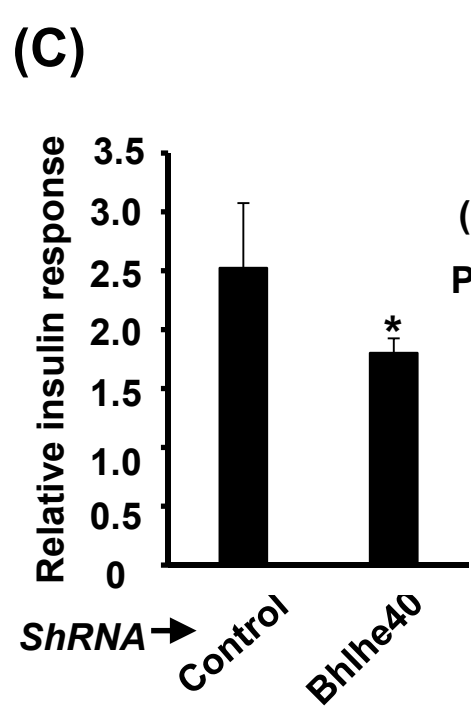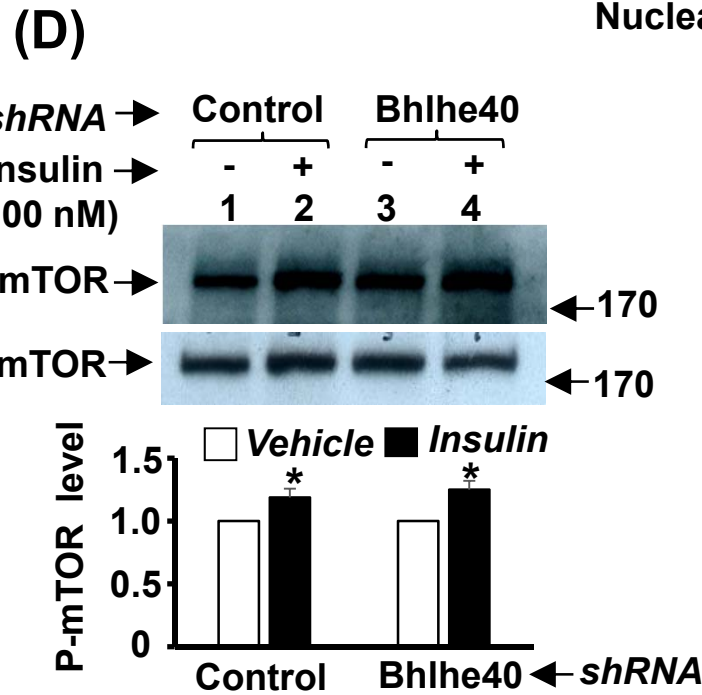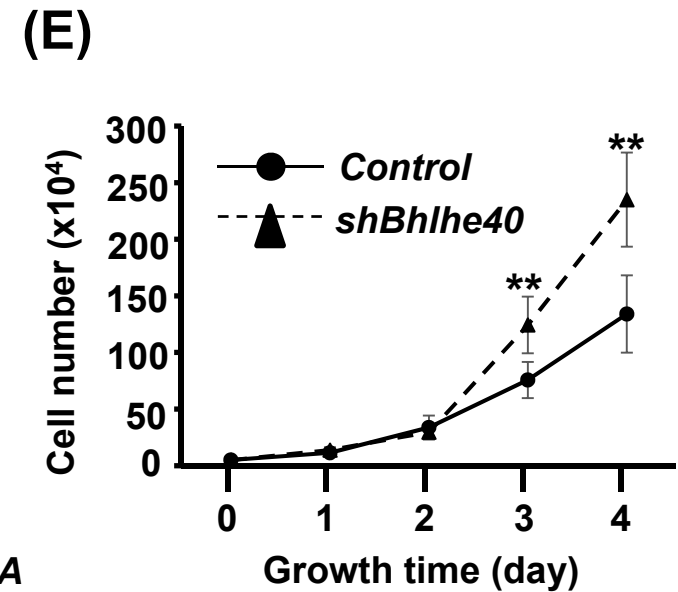

## Supplementary figure 2

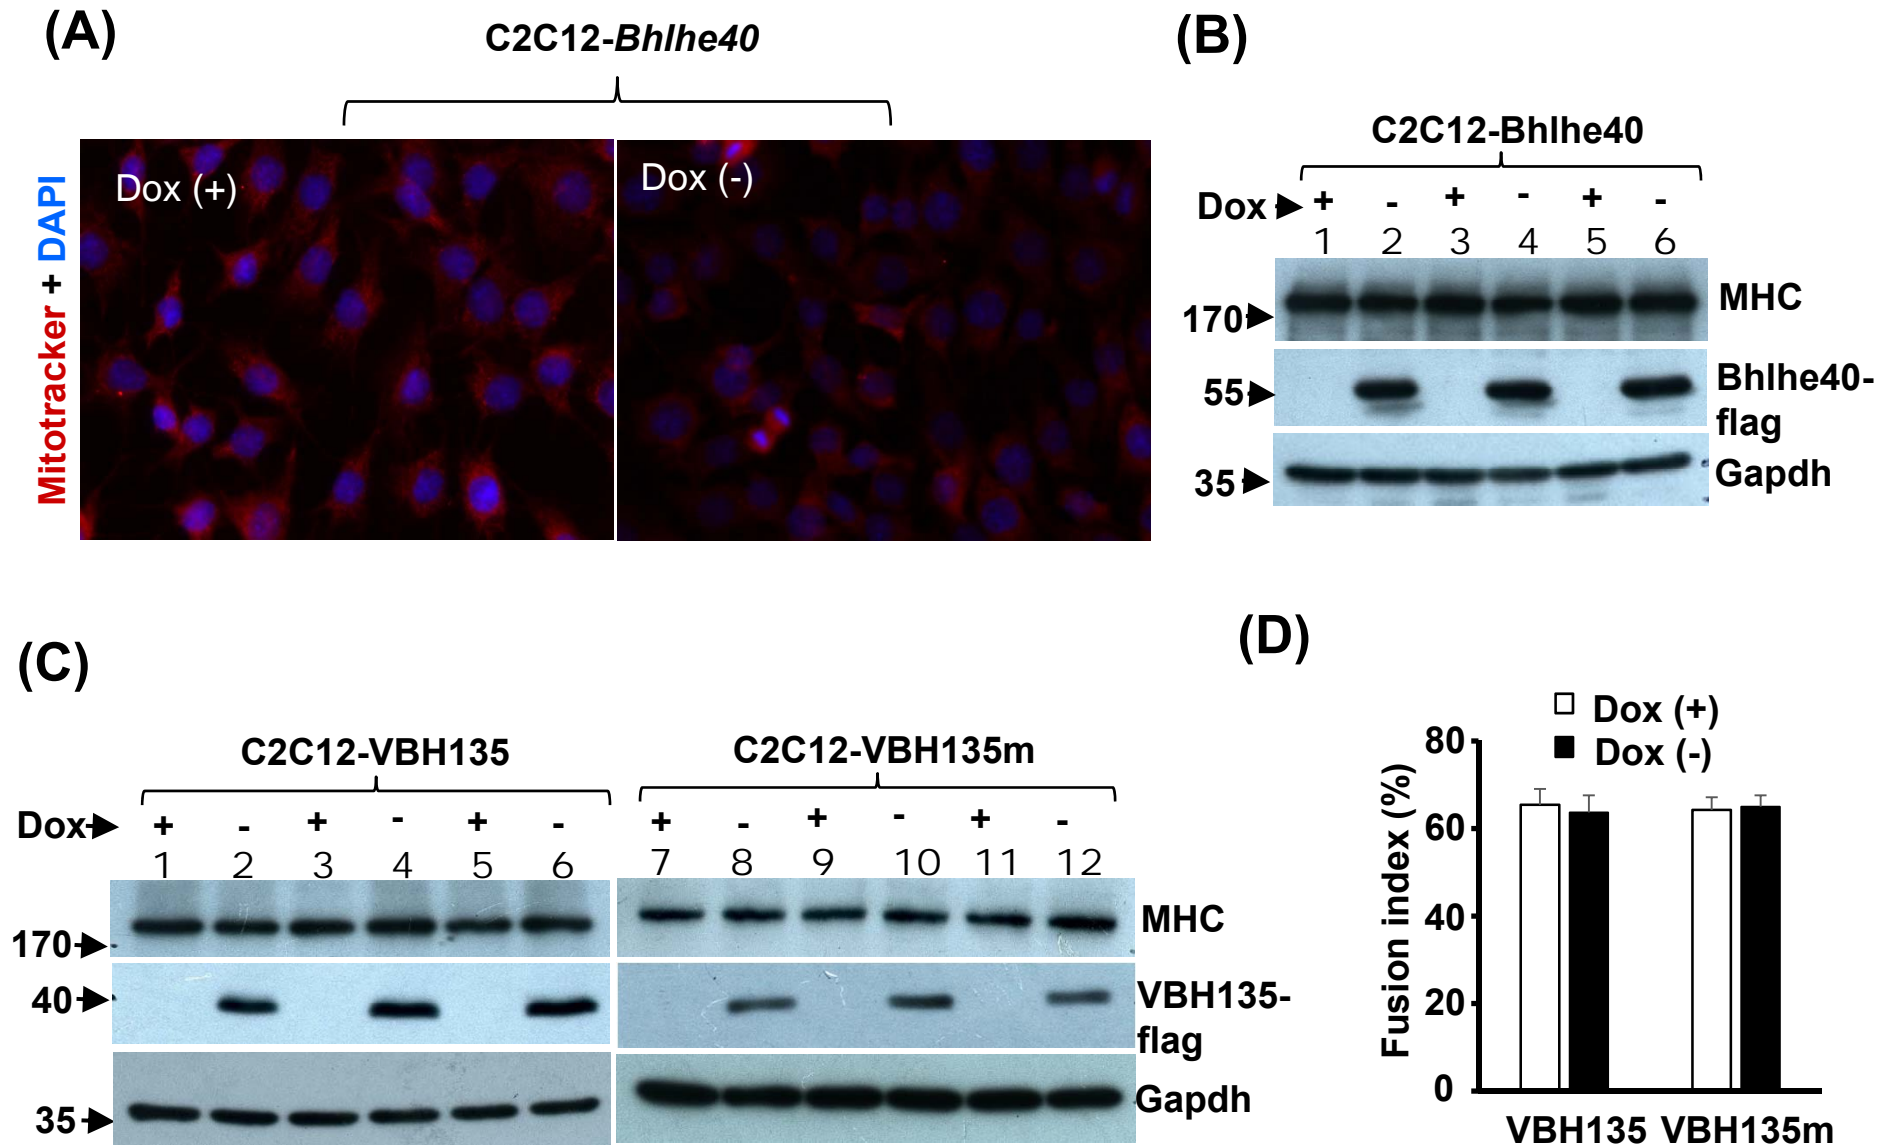

Supplementary figure 3

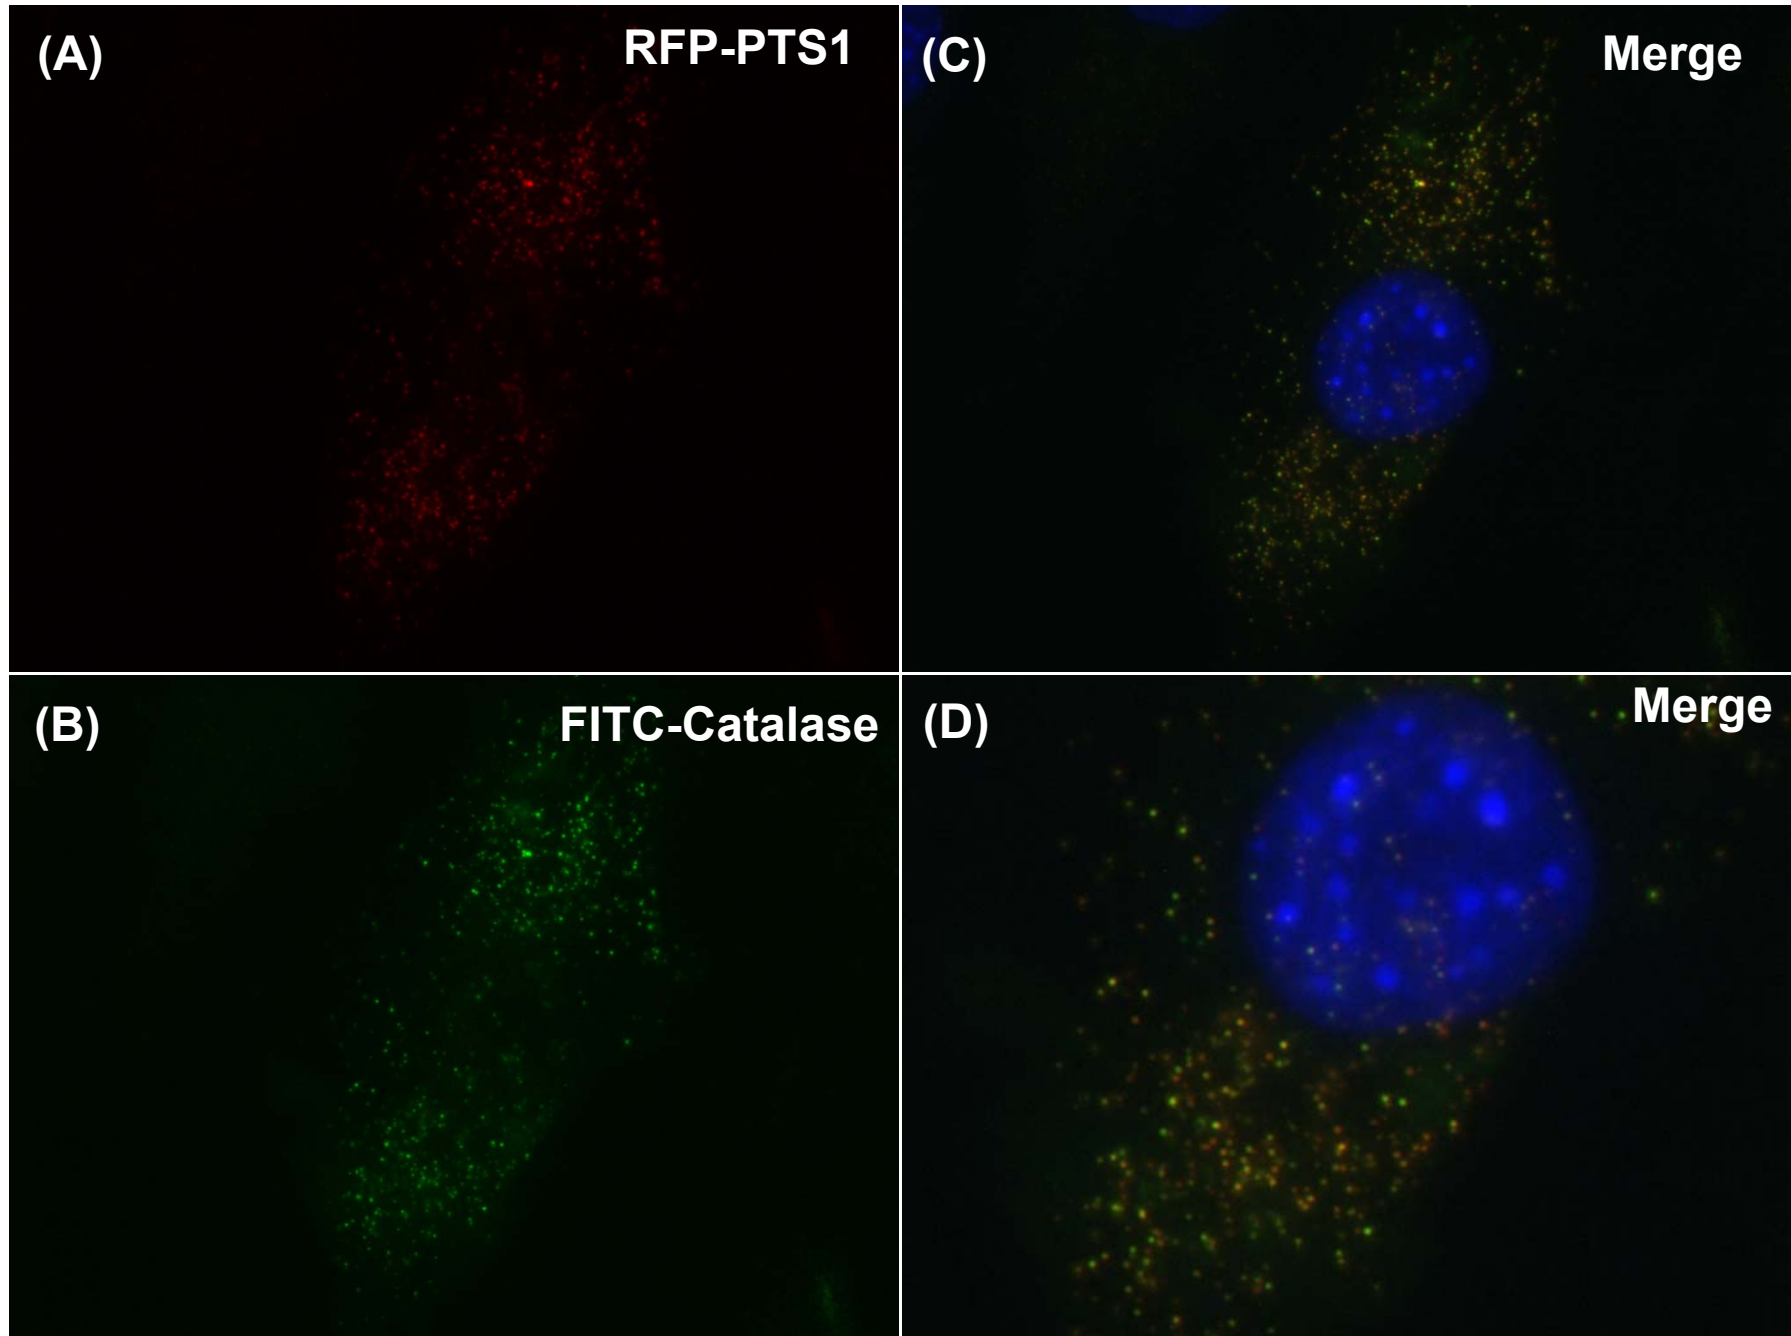

# Supplementary figure 4

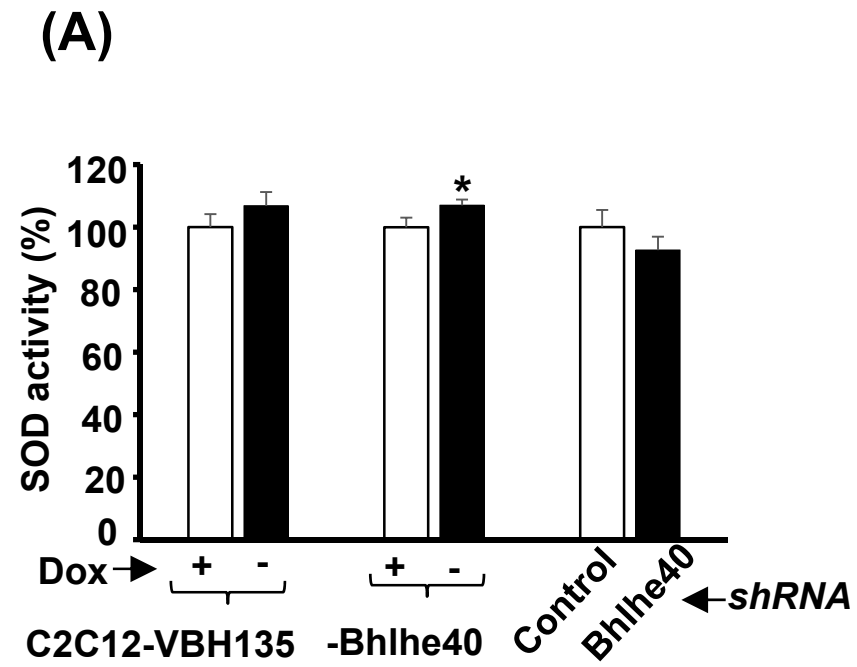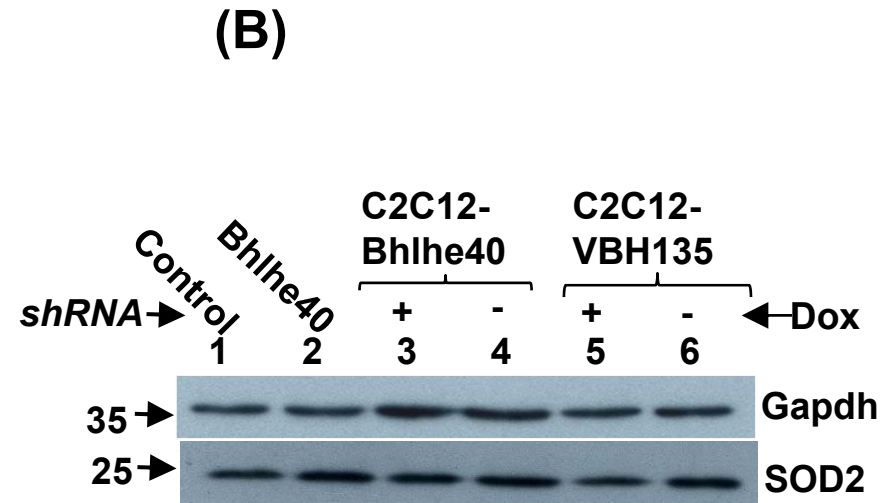

**Supplementary figure 1: The differences between *Control* and *Bhlhe40* knockdown cells**

**(A)** The expression levels of *Bhlhe40* were determined by qRT-PCR (left panel) and Western blot (right panel). *Gapdh* and Lamin B1 signals are used as input controls for mRNA and protein, respectively. **(B)** The levels of mitochondrial DNA were examined with quantitative PCR, in which nuclear genes *MyoD* and *Oct4* were used as input control for determining the levels of mitochondrial genes *cytochrome b* and *Cox2*. **(C)** The relative insulin responses of control and *Bhlhe40* knockdown cells. **(D)** Detection of Phospho- and total mTOR in vehicle and insulin treated myoblasts by Western blot. Relative levels of phospho-mTOR are shown at the bottom panel. **(E)** The growth curve of control and *Bhlhe40* knockdown cells established during a 4 day culture on 6-well dishes. \* and \*\*:  $p < 0.05$  and  $p < 0.01$ , respectively, vs. control cells.

### **Supplementary figure 2: The influences of Bhlhe40 or VBH135 on cells**

**(A)** Images of Mitotracker and DAPI stained C2C12-*Bhlhe40* myoblasts. **(B, C)** The protein levels of myosin heavy chain (MHC), Bhlhe40-flag, and VBH135-flag in myotubes (triplicates) of *Tet-off* regulated stable clones were determined by Western blot. **(D)** The fusion indexes of C2C12-VBH135 and -VBH135m after in DM for 4 days.

### **Supplementary figure 3: The RFP-PTS1 specially marks peroxisomes**

Immunofluorescent detection of Catalase was performed on C2C12 cells stably expressing RFP-PTS1 (C2C12-RFP-PTS1). The RFP **(A)** and FITC-labeled Catalase **(B)** images were merged in **(C)** to demonstrate co-localization of both signals. A higher magnification image is shown in **(D)**. All images were taken at 400X magnification.

### **Supplementary figure 4: SOD activity and SOD2 expression**

Total SOD activity in C2C12-*VBH135* and -*Bhlhe40* myotubes and in C2C12-*Control/shBhlhe40* myoblasts was determined **(A)**, The SOD2 protein levels under the same condition were determined by Western blot and is shown in **(B)**.
